# Supplementary material for: Zika virus-induced hyper excitation precedes death of mouse primary neuron
Source: PubMed Central journal article supplement (PMC5922018; doi:10.1186/s12985-018-0989-4), 2018-04-27
Supplement: 12985_2018_989_MOESM1_ESM.pdf [file 12985_2018_989_MOESM1_ESM.pdf]

**Supplementary Table 1.** Forward (grey background) and reverse (white background) primers for mouse (*Mus musculus*) genes used for Q-PCR.

| <b><i>Mus musculus</i> (mouse)</b>                     |                           |
|--------------------------------------------------------|---------------------------|
| <b>Voltage-gated Na channel type II (NM_001099298)</b> | CTTGCAAGGGGCTTTTGTCTA     |
|                                                        | GGTTTACAAATTCTGTTACATACGC |
| <b>Glutamate dehydrogenase 1 (NM_008133)</b>           | AGCTGGCCAAGAAGGGTTTT      |
|                                                        | GCATAGGTGTCAGCGATCCA      |
| <b>EAA T3 (NM_009199)</b>                              | GAAAAGCCAGGCCATAAGCG      |
|                                                        | AGCCACAAGGCTGAGATTCC      |
| <b>vGlut (NM_080853)</b>                               | CGGGAGCGGTCAGGTTTTAT      |
|                                                        | GCTGATCTTTGCGAACGTGA      |
| <b>GAT1 (NM_178703)</b>                                | CCTACACTGGCACTCTGGAC      |
|                                                        | GGTCATGGTGTCTGGACCTG      |
| <b>GABA receptor subunit (NM_008069)</b>               | TTGGGGCTTCTCTCTTTTCCC     |
|                                                        | GTCGGTCCACTGTCTTTTCA      |
| <b>18s rRNA</b>                                        | GTAACCCGTTGAACCCCAT       |
|                                                        | CCATCCAATCGGTAGTAGCG      |
