# Supplementary material for: Zika virus-induced hyper excitation precedes death of mouse primary neuron
Source: PubMed Central journal article supplement (PMC5922018; doi:10.1186/s12985-018-0989-4), 2018-04-27
Supplement: 12985_2018_989_MOESM2_ESM.pdf [file 12985_2018_989_MOESM2_ESM.pdf]

**Supplementary Table 2. Summary of *n* used for statistical data analysis of confocal images.**

|                                | <b>Fig. 5b</b>        | <b>Fig. 5c</b> | <b>Fig. 4b</b> |     |
|--------------------------------|-----------------------|----------------|----------------|-----|
| <i>n, images</i>               | <b>0 dpi</b>          | -              | 8              | 7   |
|                                | <b>Uninfected</b>     | 8              | 18             | 13  |
|                                | <b>ZIKV infected</b>  | 7              | 11             | 12  |
|                                | <b>DENV2 infected</b> | 6              | 10             | -   |
| <i>n, total cells number</i>   | <b>0 dpi</b>          | -              | 1845           | 333 |
|                                | <b>Uninfected</b>     | 1294           | 2366           | 565 |
|                                | <b>ZIKV infected</b>  | 878            | 761            | 565 |
|                                | <b>DENV2 infected</b> | 770            | 1725           | -   |
| <i>n, coverslips</i>           | <b>0 dpi</b>          | -              | 2              | 2   |
|                                | <b>Uninfected</b>     | 2              | 3              | 3   |
|                                | <b>ZIKV infected</b>  | 2              | 4              | 3   |
|                                | <b>DENV2 infected</b> | 2              | 4              | -   |
| <i>n, experimental repeats</i> | <b>0 dpi</b>          | -              | 1              | 1   |
|                                | <b>Uninfected</b>     | 1              | 1              | 2   |
|                                | <b>ZIKV infected</b>  | 1              | 1              | 2   |
|                                | <b>DENV2 infected</b> | 1              | -              | -   |
