# Supplementary material for: Zika virus-induced hyper excitation precedes death of mouse primary neuron
Source: PubMed Central journal article supplement (PMC5922018; doi:10.1186/s12985-018-0989-4), 2018-04-27
Supplement: 12985_2018_989_MOESM3_ESM.pdf [file 12985_2018_989_MOESM3_ESM.pdf]

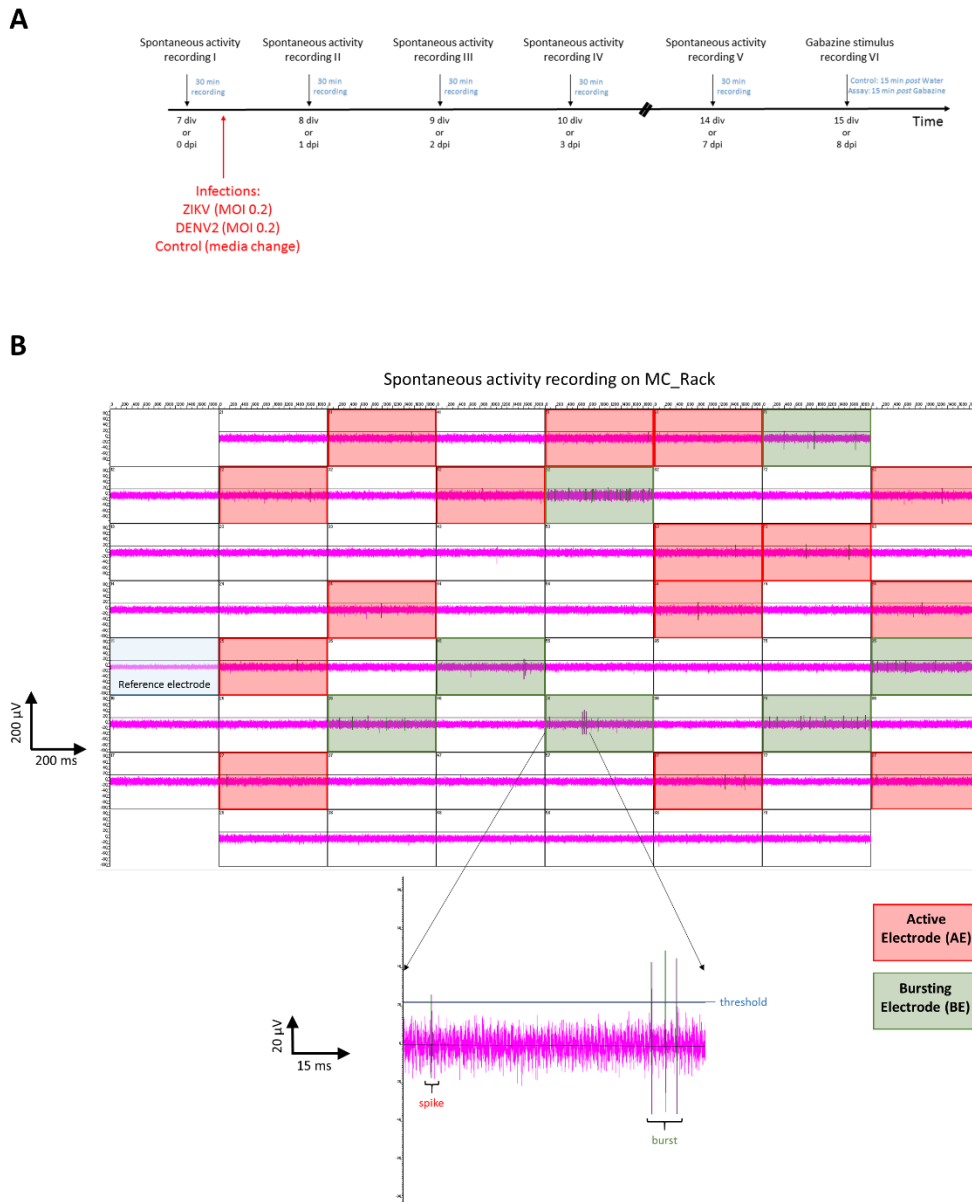

**Supplementary Figure 1. Procedure of primary neuron culture recording on microelectrodes array (MEA). A** Infection and temporal recording of primary neuron networks on MEA. **B** Experimental setup and MEA analysis parameters illustration.
