# Supplementary material for: Zika virus-induced hyper excitation precedes death of mouse primary neuron
Source: PubMed Central journal article supplement (PMC5922018; doi:10.1186/s12985-018-0989-4), 2018-04-27
Supplement: 12985_2018_989_MOESM7_ESM.pdf [file 12985_2018_989_MOESM7_ESM.pdf]

**Table S3. Summary of statistical data analysis of mouse neuron cultures spontaneous activity at different times post infection (Fig. 1c).**

| <b>Time line</b>           | <b>Mouse (<i>Mus musculus</i>)</b>                                                  |                                                                                     |                                                                                     |                                                                                   |
|----------------------------|-------------------------------------------------------------------------------------|-------------------------------------------------------------------------------------|-------------------------------------------------------------------------------------|-----------------------------------------------------------------------------------|
|                            | <b>1 dpi</b>                                                                        | <b>2 dpi</b>                                                                        | <b>3 dpi</b>                                                                        | <b>7 dpi</b>                                                                      |
| <b>Uninfected to ZIKV</b>  | t = 0.078,<br>df = 217<br>$n_{\text{uninfected}} = 164$<br>$n_{\text{ZIKV}} = 55$   | t = 8.317,<br>df = 452<br>$n_{\text{uninfected}} = 281$<br>$n_{\text{ZIKV}} = 173$  | t = 1.816,<br>df = 217<br>$n_{\text{uninfected}} = 164$<br>$n_{\text{ZIKV}} = 55$   | t = 5.65,<br>df = 451<br>$n_{\text{uninfected}} = 281$<br>$n_{\text{ZIKV}} = 172$ |
|                            | NS                                                                                  | $P < 0.0001$                                                                        | NS                                                                                  | $P < 0.0001$                                                                      |
| <b>Uninfected to DENV2</b> | t = 4.903,<br>df = 299<br>$n_{\text{uninfected}} = 164$<br>$n_{\text{DENV2}} = 137$ | t = 4.735,<br>df = 426<br>$n_{\text{uninfected}} = 281$<br>$n_{\text{DENV2}} = 147$ | t = 1.897,<br>df = 298<br>$n_{\text{uninfected}} = 164$<br>$n_{\text{DENV2}} = 136$ | t = 10,<br>df = 419<br>$n_{\text{uninfected}} = 281$<br>$n_{\text{DENV2}} = 140$  |
|                            | $P < 0.0001$                                                                        | $P < 0.0001$                                                                        | NS                                                                                  | $P < 0.0001$                                                                      |
| <b>ZIKV to DENV2</b>       | t = 3.419,<br>df = 190<br>$n_{\text{ZIKV}} = 55$<br>$n_{\text{DENV2}} = 137$        | t = 3.553,<br>df = 318<br>$n_{\text{ZIKV}} = 173$<br>$n_{\text{DENV2}} = 147$       | t = 0.079,<br>df = 189<br>$n_{\text{ZIKV}} = 55$<br>$n_{\text{DENV2}} = 136$        | t = 14,<br>df = 310<br>$n_{\text{ZIKV}} = 172$<br>$n_{\text{DENV2}} = 140$        |
|                            | $P = 0.0008$                                                                        | $P = 0.0004$                                                                        | NS                                                                                  | $P < 0.0001$                                                                      |
