# Supplementary material for: Zika virus-induced hyper excitation precedes death of mouse primary neuron
Source: Springer Nature journal article supplement (doi:10.1186/s12985-018-0989-4), 2018-04-27
Supplement: MOESM5 [file 15725576]

**A**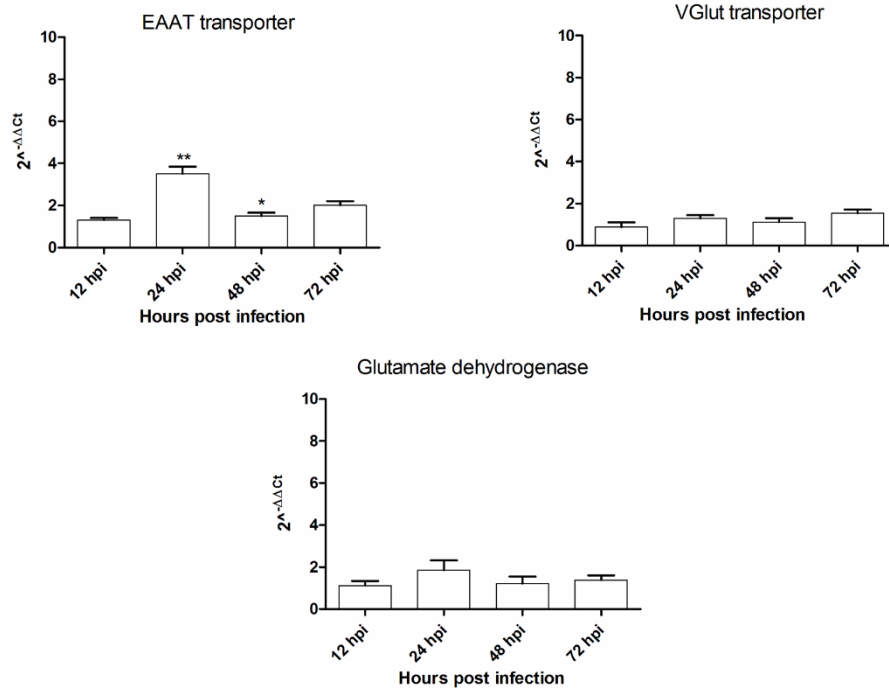**B**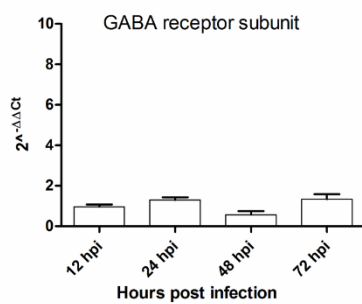**C**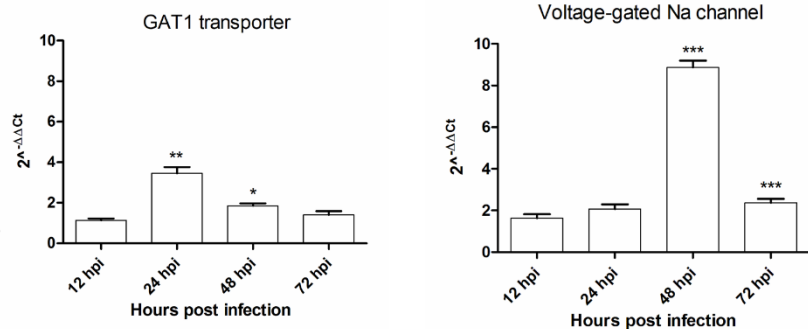

**Supplementary Figure 3. Gene expression comparison after ZIKV infection in neuron cultures.** *Mus musculus* neuron culture were infected with ZIKV and real-time PCR was performed at various time points. **A** Bar plots illustrating mRNA expression of Glutamate pathway proteins: Glutamate transporters (EAAT and VGlut) and Glutamate dehydrogenase (GDH). **B** Bar plots illustrating mRNA expression of GABA<sub>A</sub> pathway proteins: GABA<sub>A</sub> receptor subunit and GABA<sub>A</sub> transporter (GAT1). **C** Bar plots illustrating mRNA expression of Voltage-gated sodium channel (VGNaC). All bar plots show mean value with  $\pm$ SEM ( $n = 3$ ) of fold increase compared both to housekeeping gene and uninfected culture (ratio of  $2^{-\Delta\Delta Ct}$ ) at the same time point in hours post infection (hpi). Statistical differences were calculated with unpaired t tests by comparing mRNA expression at time<sub>i</sub> to time<sub>i-1</sub> within each group.
