# Supplementary material for: Zika virus-induced hyper excitation precedes death of mouse primary neuron
Source: Springer Nature journal article supplement (doi:10.1186/s12985-018-0989-4), 2018-04-27
Supplement: MOESM6 [file 15725576]

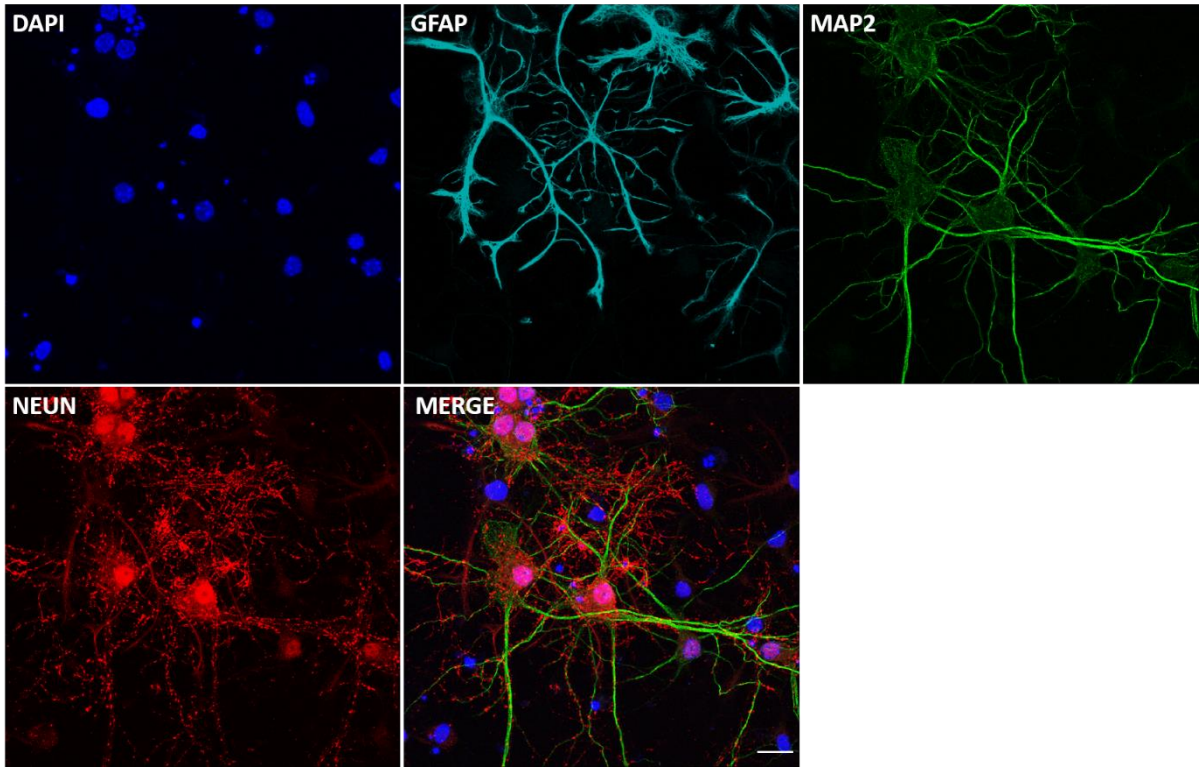

**Supplementary Figure 4. Mouse primary neuron culture at 14 days post seeding.** *Mus musculus* primary neuron culture observed under confocal microscopy with different staining for neuronal network structure. GFAP staining reveals the presence of glial cells in the culture. Scale bar is 20  $\mu\text{m}$ .
